# Supplementary material for: [Mo3S13]2−as bidirectional cluster catalysts for high-performance Li–S batteries
Source: Royal Society of Chemistry journal article supplement (doi:10.1039/d2cy00614f), 2022-01-01
Supplement: d2cy00614f1.pdf [file d2cy00614f1.pdf]

## Supporting Information

# **[Mo<sub>3</sub>S<sub>13</sub>]<sup>2-</sup> as Bidirectional Cluster Catalysts for High-Performance Li-S Batteries**

Zhiyuan Ma,<sup>a</sup> Jie Gu,<sup>a</sup> Xinyuan Jiang,<sup>a</sup> Guang Yang,<sup>a</sup> Zhen Wu,<sup>a</sup> Ju Xie,<sup>a</sup> Ming Chen,<sup>a</sup>  
Lubin Ni,<sup>a\*</sup> Guowang Diao<sup>a\*</sup>

<sup>a</sup> School of Chemistry and Chemical Engineering, Yangzhou University, Yangzhou  
225002, Jiangsu, People's Republic of China.

\*Corresponding contributor. E-mail: lbni@yzu.edu.cn  
gwdiao@yzu.edu.cn

## Section SI. Experimental Methods

**Synthesis of the MCHS.** MHCS was prepared according to the previous publication.<sup>1</sup> Tetrapropyl orthosilicate (3.46 mL) was added in ethanol (70 mL) and deionized water (10 mL) with stirring while adding ammonia (3 mL, 25 wt%). Then resorcinol (0.4 g) and formaldehyde (0.56 mL, 37 wt%) were placed in the above solution with stirring for 24h. The achieved  $\text{SiO}_2@\text{SiO}_2/\text{RF}$  was collected by deionized water and ethanol for three times. The synthesized  $\text{SiO}_2@\text{SiO}_2/\text{RF}$  was calcined for 5h at 800 °C with an Ar atmosphere and finally etched  $\text{SiO}_2$  with NaOH.

**Preparation of  $\text{S}@\text{MCHS}@\text{Mo}_3\text{S}_{13}$ .** The synthesized MHCS (30 mg) was added in ammonium polysulfide solution (6 ml, 25 wt%, Acros Organics) under an  $\text{N}_2$  atmosphere.  $(\text{NH}_4)_6\text{Mo}_7\text{O}_{24}\cdot 4\text{H}_2\text{O}$  (180 mg) was added into the water at room temperature, then the mixed solution was added to the above solution and heated to 90 °C for 24 hours. The products were collected by filtration, washed by water, carbon disulfide, diethyl ether and dried in a vacuum oven at 130 °C.<sup>2</sup> The synthesized  $\text{MCHS}@\text{Mo}_3\text{S}_{13}$  were mixed with sublimed sulfur in the mass ratio of 3:7 and heated to 155 °C for 20 hours.<sup>1</sup>

**Lithium polysulfides adsorption study.**  $\text{Li}_2\text{S}_4$  solution was prepared by mixing  $\text{Li}_2\text{S}$  and S with a mole ratio of 1: 3 (184, 384 mg) adding in 100 mL of DME solution with continuous stirring.<sup>3</sup> 0.5 mL of  $\text{Li}_2\text{S}_4$  solution, 9.5 mL of DME and 50 mg of  $(\text{NH}_4)_2\text{Mo}_3\text{S}_{13}$  materials were added to a dilute  $\text{Li}_2\text{S}_4$  solution with stirring for 30 min.<sup>3</sup>

**Oxidation of Lithium Sulfide Test.**  $\text{Li}_2\text{S}$  (5 mg) was added into DME (10 mL) solvent. Then 10 mg of  $(\text{NH}_4)_2\text{Mo}_3\text{S}_{13}$  was also added to the  $\text{Li}_2\text{S}$  reaction mixture with stirring for 20 min.<sup>4</sup>

**Materials characterization.** The structure of the sample was investigated by Powder X-ray diffraction (PXRD) (WAXD, D8 Advance, Bruker,  $\text{Cu K}\alpha$ ,  $\lambda = 1.54 \text{ \AA}$ ). Thermogravimetric Analysis (TGA, Netzsch TG209 F3) measurements were collected with a  $10 \text{ }^\circ\text{C min}^{-1}$  from room temperature to 800 °C under  $\text{N}_2$  flow. Scanning electron microscopy (SEM, Zeiss Supra-55VP) and transmission Electron

Microscopy (TEM, Philips TECNAI-12) was used to characterize the external morphology. An X-ray photoelectron spectrometer (XPS, Thermo Escalab 250 system) was used to analyze the elemental chemical status of the sample with Al  $K\alpha$  radiation ( $h\nu = 1486.6$  eV) and the chamber pressure was kept below  $2 \times 10^{-9}$  Torr. Ultraviolet-visible absorption spectra (UV/vis, Shimadzu UVmini-1280 spectrophotometer) was used to analyze the elemental chemical status of the sample.

**Computational methods.** All the computational studies of the  $[\text{Mo}_3\text{S}_{13}]^{2-}$  clusters and  $\text{Li}_2\text{S}_x$  ( $x=2, 4$  and  $6$ ) systems were performed using the Gaussian 09 package. All the  $[\text{Mo}_3\text{S}_{13}]^{2-}$  clusters and  $\text{Li}_2\text{S}_x$  molecules were optimized by the density functional theory (DFT). Hybrid functional m06-2x was employed with the 6-31g(d) basis set for Li, O, and S elements, and SDD pseudopotential basis set for Mo element.<sup>5,6</sup> The binding energy ( $E_b$ ) was calculated as  $E_b = E(\text{Mo}_3\text{S}_{13}\text{-Li}_2\text{S}_x) - E(\text{Li}_2\text{S}_x) - E(\text{Mo}_3\text{S}_{13})$ , where  $E(\text{Mo}_3\text{S}_{13}\text{-Li}_2\text{S}_x)$  is the energy of  $\text{Li}_2\text{S}_x$  and  $[\text{Mo}_3\text{S}_{13}]^{2-}$  interaction system and  $E(\text{Li}_2\text{S}_x)$  and  $E(\text{Mo}_3\text{S}_{13})$  are the energies of the free  $\text{Li}_2\text{S}_x$  and  $[\text{Mo}_3\text{S}_{13}]^{2-}$  cluster, respectively.

**Li-S Cell Assembly and Electrochemical measurements.** The working electrode was prepared by mixing 70 wt% of the designated sample, 20 wt% of Super P Li (TIMCAL), and 10 wt% of binder polyvinylidene fluoride (PVDF HSV900) in N-methylpyrrolidone (NMP) slurry onto a carbon paper (GDL 28 AA, SGL) current collector. Then electrode was dried in a vacuum drying oven at 60 °C for 12 h and cut into a disc with a diameter of 16 mm. The average sulfur loading on each electrode disk is about  $\sim 1.5$  mg/cm<sup>2</sup> with an electrolyte-to-sulfur (E/S) ratio of  $\sim 16$  mL g<sup>-1</sup> and  $\sim 8$  mL g<sup>-1</sup>. For comparison, a thick cathode with about  $\sim 3.6$  mg cm<sup>-2</sup> sulfur loading was prepared with an electrolyte-to-sulfur (E/S) ratio of  $\sim 8$  mL g<sup>-1</sup> in the same manner. The 2032-type coin-cells were assembled in an argon-filled glove box with a microporous membrane (Celgard 2300) as separator and Li metal as the counter electrode. The electrolyte was 1 M Lithium bis(trifluoromethylsulphonyl)imide (LiTFSI) in a mixture of 1,3-dioxolane (DOL) and dimethoxymethane (DME) (1:1 by volume) with 1 wt% LiNO<sub>3</sub> as an additive.

Pouch cell based on S@MCHS@Mo<sub>3</sub>S<sub>13</sub>/ cathode (S loading of 4.0 mg • cm<sup>-2</sup>, S mass of 96 mg) with a size of 4.3 cm × 5.6 cm was assembled with two doublesided cathodes and a celgard 2300 separator. The cell was vacuum-sealed in an aluminum-plastic package after injecting electrolyte. The amount of the electrolyte was strictly controlled with an electrolyte-to-sulfur (E/S) ratio of ~12 mL g<sup>-1</sup>. The discharge/charge cycles and galvanostatic intermittent titration technique (GITT) were tested galvanostatically on a battery measurement system (Neware) at room temperature in a voltage cut off protocol between 2.8 and 1.7 V. Cyclic voltammetry (CV), electrochemical impedance spectroscopy (EIS) and potentiostat intermittent titration technique (PITT) were measured on an electrochemical workstation (1010 E, Gamary, America). EIS was tested with an amplitude of 5 mV in a frequency range from 10 kHz to 10 mHz at open-circuit potential and CV was performed in the potential range of 2.8-1.7 V at a scan rate of 0.05 mV s<sup>-1</sup>.

Section SII. Supplementary Figures and Table.

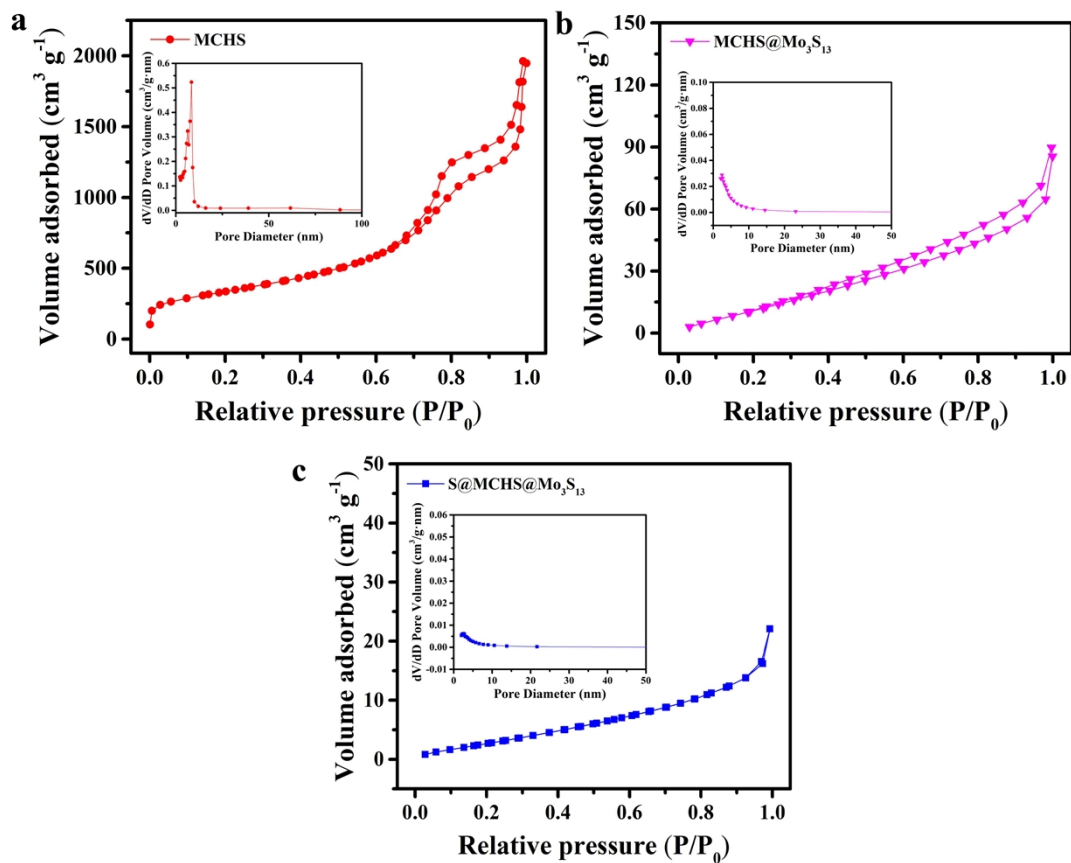

**Figure S1.**  $N_2$  adsorption-desorption isotherms and corresponding pore size distribution curves for (a) MCHS, (b) MCHS@Mo<sub>3</sub>S<sub>13</sub> and (c) S@MCHS@Mo<sub>3</sub>S<sub>13</sub>.

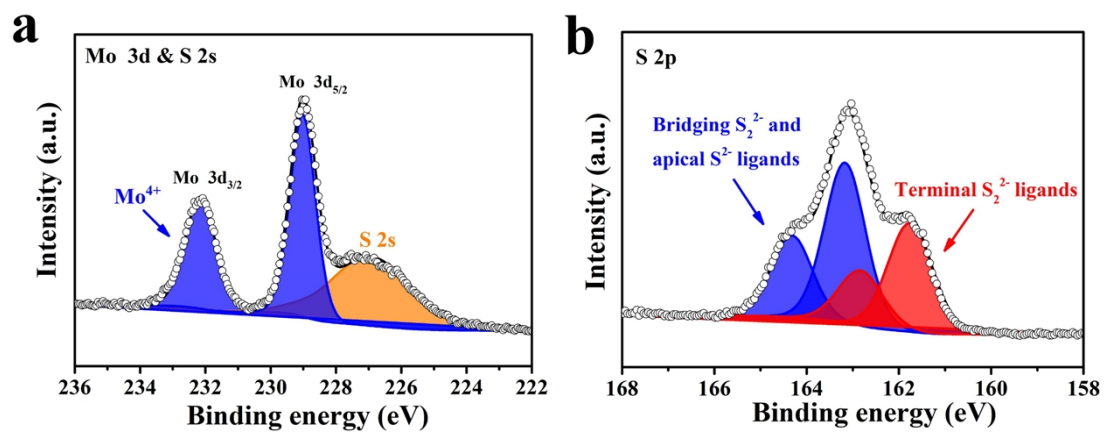

Figure S2. XPS survey spectrum of the as-prepared MCHS@Mo<sub>3</sub>S<sub>13</sub> composite.

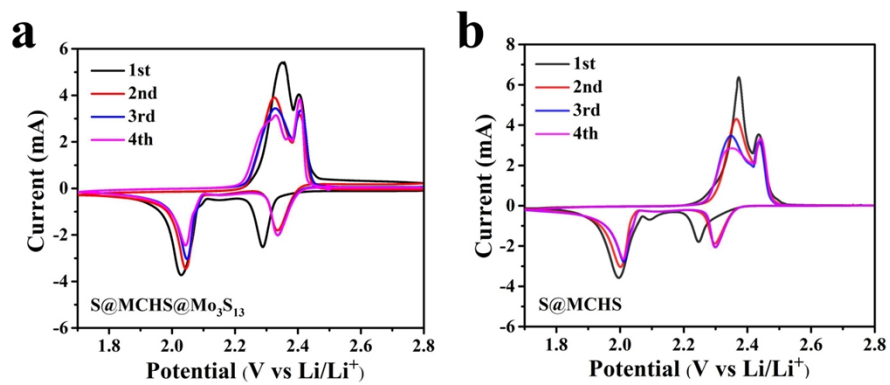

**Figure S3.** CV curves of (a) S@MCHS@Mo<sub>3</sub>S<sub>13</sub> and (b) S@MCHS composite at a scanning rate of 0.05 mV·s<sup>-1</sup>.

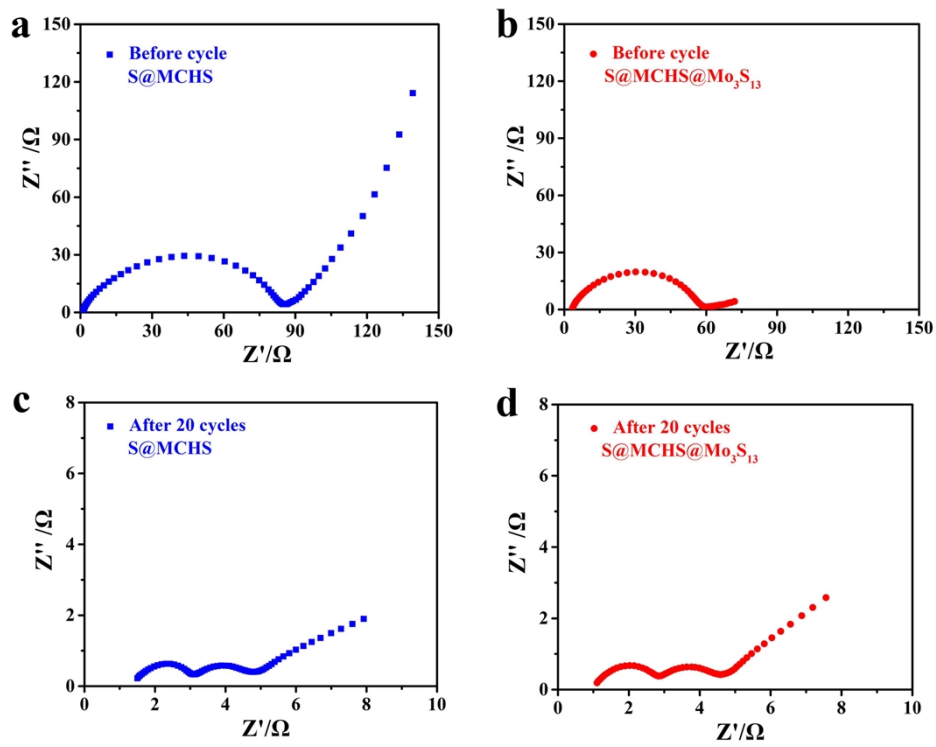

**Figure S4.** Nyquist plots of S@MCHS and S@MCHS@Mo<sub>3</sub>S<sub>13</sub> composite before and after 20 cycles.



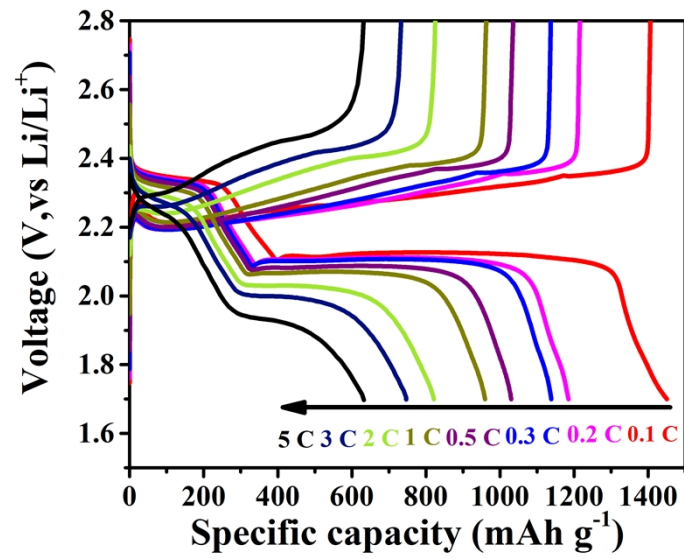

**Figure S5.** Galvanostatic charge/discharge curves of S@MCHS@Mo<sub>3</sub>S<sub>13</sub> cathode at different current rates.

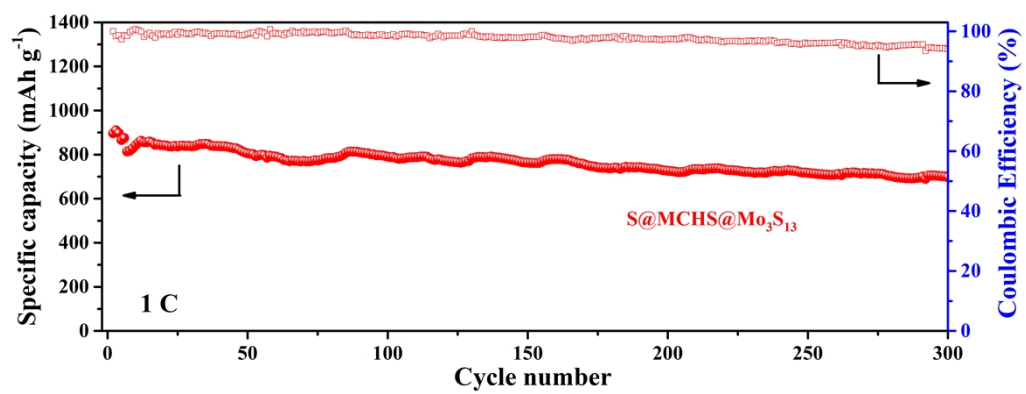

**Figure S6.** Cycling performance of S@MCHS@Mo<sub>3</sub>S<sub>13</sub> cathodes and S cathodes at 1.0 C under low electrolyte to sulfur ratio of 8 mL g<sup>-1</sup>.

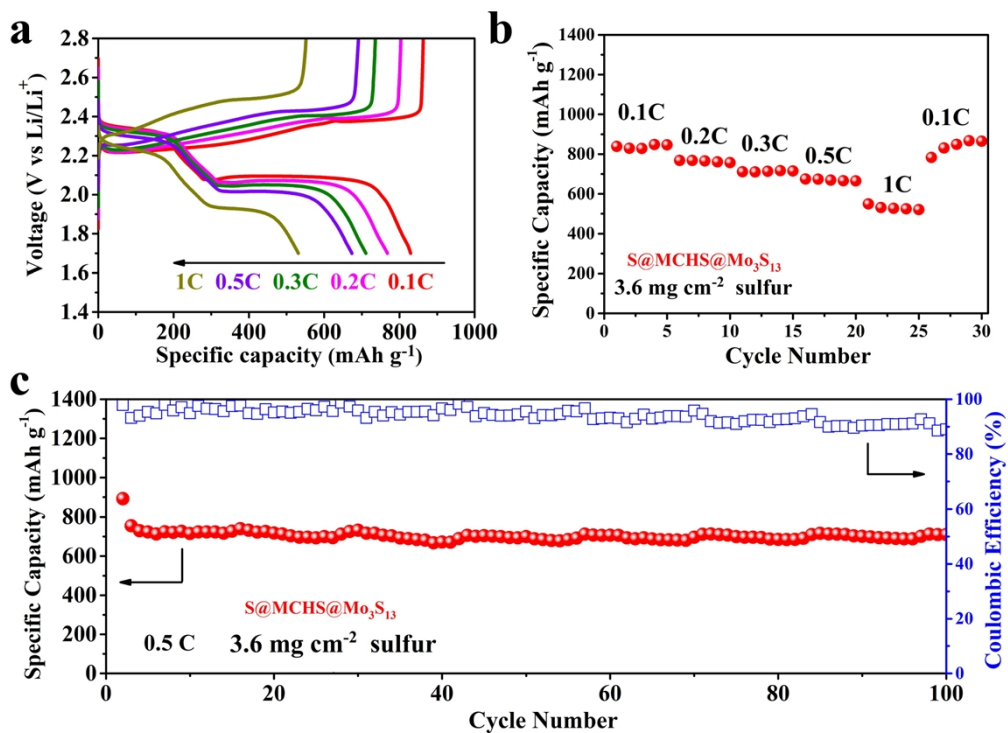

**Figure S7.** The electrochemical performance of S@MCHS@Mo<sub>3</sub>S<sub>13</sub> cathodes with high S sulfur loading of 3.6 mg cm<sup>-2</sup> under low electrolyte to sulfur ratio of 8 mL g<sup>-1</sup>. (a) GCD curves of S@MCHS@Mo<sub>3</sub>S<sub>13</sub> cathode, (b) Rate performance of S@MCHS@Mo<sub>3</sub>S<sub>13</sub> cathode, (c) Cycling performance of S@MCHS@Mo<sub>3</sub>S<sub>13</sub> cathode at 0.5 C.

**Table S1.** A summary of representative MoS<sub>x</sub>-based cathodes.

| Cathode Material <sup>[a]</sup>            | Maximum Initial Capacity (mAh g <sup>-1</sup> ) | Highest Rate (C) | Cycle Number (cycles) | Capacity Retention at Highest Rate (mAh g <sup>-1</sup> ) | Ref.             |
|--------------------------------------------|-------------------------------------------------|------------------|-----------------------|-----------------------------------------------------------|------------------|
| N-doped graphene/MoS <sub>2</sub> /sulfur  | 1280                                            | 0.3              | 180                   | 591                                                       | 7                |
| NMCS/MoS <sub>2</sub> /sulfur              | 1250                                            | 1                | 500                   | 480                                                       | 8                |
| MoS <sub>2</sub> /Li <sub>2</sub> S        | 1000                                            | 0.5              | 150                   | 488                                                       | 9                |
| Graphene/MoS <sub>2</sub> /S               | 1180                                            | 1                | 500                   | 368                                                       | 10               |
| PEO/MoS <sub>2</sub> /Graphene/sulfur      | 1250                                            | 1                | 200                   | 524                                                       | 11               |
| Mo <sub>6</sub> S <sub>8</sub> /sulfur     | 1380                                            | 1                | 400                   | 728                                                       | 12               |
| 1T-MoS <sub>2</sub> /Li <sub>2</sub> S     | 1410                                            | 0.5              | 500                   | 450                                                       | 13               |
| MoS <sub>3</sub>                           | 1000                                            | 0.45 A/g         | 1000                  | 600                                                       | 14               |
| <b>S@MCHS@Mo<sub>3</sub>S<sub>13</sub></b> | <b>1450</b>                                     | <b>3</b>         | <b>500</b>            | <b>546</b>                                                | <b>This work</b> |

<sup>[a]</sup> NMCS = N-doped mesoporous carbon sphere, PEO = poly(ethylene oxide).

## References

1. Y. Liu, Z. Ma, G. Yang, Z. Wu, Y. Li, J. Gu, J. Gautam, X. Gong, A. N. Chishti, S. Duan, C. Chen, M. Chen, L. Ni and G. Diao, *Adv. Funct. Mater.*, 2021, 2109462.
2. J. Kibsgaard, T. Jaramillo and F. Besenbacher, *Nature. Chem.* 2014, **6**, 248.
3. L. Ni, G. Zhao, Y. Wang, Z. Wu, Y. Liao, G. Yang and G. Diao, *Chemistry, an Asian journal*. 2017, **12**, 3128.
4. Z. Ma, Y. Liu, J. Gautam, W. Liu, A. N. Chishti, J. Gu, G. Yang, Z. Wu, J. Xie, M. Chen, L. Ni and G. Diao, *Small*, 2021, **17**, 2102710.
5. X. Y. Cao and M. Dolg, *J. Chem. Phys.*, 2001, **115**, 7348-7355.
6. Y. Zhao, and D. G. Truhlar, *Theor. Chem. Acc.* 2008, **120**, 215-241.
7. Z. Li, S. Deng, R. Xu, L. Wei, X. Su and M. Wu, *Electrochimica. Acta.*, 2017, **252**, 200–207.
8. S. Jiang, M. Chen, X. Wang, Z. Wu, P. Zeng, C. Huang and Y. Wang, *ACS Sustainable Chem. Eng.*, 2018, **6**, 16828–16837.
9. J. Balach, T. Jaumann and L. Giebeler, *J. Ensm.* 2017 **.03**. 013.
10. L. Tan, X. Li, Z. Wang, G. Guo, and J. Wang, *ACS Appl. Mater. Interfaces.*, 2018, **10**, 3707–3713.
11. F. Sun, H. Tang, B. Zhang, X. Li, C. Yin, Z. Yue, L. Zhou, Y. Li and J. Shi, *ACS Sustainable Chem. Eng.*, 2018, **6**, 974–982.
12. W. Xue, D. Yu, L. Suo, C. Wang, Z. Wang, G. Xu, X. Xiao, M. Ge, M. Ko, Y. chen, L. Qie, Z. Zhu, A. S. Helal, W. –K. Lee and J. Li, *Matter*, **1**, 1047–1060.
13. M. Wang, H. Yang, K. Shen, H. Xu, W. Wang, Z. Yang, L. Zhang, J. Chen, Y. Huang, M. chen, D. Mitlin and X. Li, *Small Methods*, 2020, 2000353.
14. H. Ye, L. Ma, Y. Zhou, L. Wang, N. Han, F. Zhao, J. Deng, T. Wu, Y. Li and J. Lu, *PNAS*, 2017, **50**, 13091-13096.
